# Supplementary material for: Early childhood risk and resilience factors for behavioural and emotional problems in middle childhood
Source: PubMed Central journal article supplement (PMC4083129; doi:10.1186/1471-2431-14-166), 2014-07-01
Supplement: 1471-2431-14-166-S1.pdf [file 1471-2431-14-166-S1.pdf]

## SECTION 1: LOOKING TO THE FUTURE

All children and families are different. There are no right answers to the following questions. We are interested in what you imagine for the future of your child, and what you perceive to be important for success.

### 1. What does your child want to be when he/she grows up?

---

### 2. Considering your child's educational future, what is the highest level of schooling that you think he/she will complete? (check one)

- Complete post-graduate qualifications at a university (e.g. a Masters degree, professional designation such as law or medicine)
- Complete a university degree
- Complete a community college, technical college, or a trade/vocational program
- Complete high school
- Less than high school
- No formal schooling

### 3. For each of the following, please rate its importance for your child's OVERALL SUCCESS IN THE FUTURE.

|                                                                | Not important         | Somewhat important    | Neutral               | Important             | Very important        |
|----------------------------------------------------------------|-----------------------|-----------------------|-----------------------|-----------------------|-----------------------|
| <b>Academic Skills: Math</b>                                   | <input type="radio"/> | <input type="radio"/> | <input type="radio"/> | <input type="radio"/> | <input type="radio"/> |
| <b>Academic Skills: Science</b>                                | <input type="radio"/> | <input type="radio"/> | <input type="radio"/> | <input type="radio"/> | <input type="radio"/> |
| <b>Academic Skills: Reading/Writing</b>                        | <input type="radio"/> | <input type="radio"/> | <input type="radio"/> | <input type="radio"/> | <input type="radio"/> |
| <b>Technical Skills</b><br>(e.g. computers)                    | <input type="radio"/> | <input type="radio"/> | <input type="radio"/> | <input type="radio"/> | <input type="radio"/> |
| <b>Trade Skills</b><br>(e.g. electronics, carpentry, plumbing) | <input type="radio"/> | <input type="radio"/> | <input type="radio"/> | <input type="radio"/> | <input type="radio"/> |
| <b>Fine Arts</b><br>(e.g. theatre, music, art)                 | <input type="radio"/> | <input type="radio"/> | <input type="radio"/> | <input type="radio"/> | <input type="radio"/> |
| <b>Social Skills</b>                                           | <input type="radio"/> | <input type="radio"/> | <input type="radio"/> | <input type="radio"/> | <input type="radio"/> |
| <b>Healthy Lifestyle</b><br>(e.g. good diet, adequate rest)    | <input type="radio"/> | <input type="radio"/> | <input type="radio"/> | <input type="radio"/> | <input type="radio"/> |
| <b>Active Lifestyle</b><br>(e.g. fitness)                      | <input type="radio"/> | <input type="radio"/> | <input type="radio"/> | <input type="radio"/> | <input type="radio"/> |
| <b>Community Involvement</b><br>(e.g. volunteering)            | <input type="radio"/> | <input type="radio"/> | <input type="radio"/> | <input type="radio"/> | <input type="radio"/> |

## SECTION 2: ACTIVITIES

This section asks about recreational and other activities that your family may participate in. Some of these questions refer to your child, while others are more specific to you, the parent.

1. Putting yourself in your child's shoes, what would you say is the best part of his or her week?

---

2. In an average year, HOW MANY TIMES does your child attend the following activities?

|                                                      | None                  | Once                  | 2 - 3 times           | 4 - 6 times           | 7 or more times       |
|------------------------------------------------------|-----------------------|-----------------------|-----------------------|-----------------------|-----------------------|
| A sporting event (such as a hockey or football game) | <input type="radio"/> | <input type="radio"/> | <input type="radio"/> | <input type="radio"/> | <input type="radio"/> |
| An arts or cultural event                            | <input type="radio"/> | <input type="radio"/> | <input type="radio"/> | <input type="radio"/> | <input type="radio"/> |
| A camp during school break                           | <input type="radio"/> | <input type="radio"/> | <input type="radio"/> | <input type="radio"/> | <input type="radio"/> |

3. In an average week, HOW MUCH TIME does your child spend participating in the following activities outside of school hours? Note: if activity is seasonal but has already occurred (e.g. outdoor soccer, dance classes in the spring), answer according to that season.

|                                                                                                  | None                  | Less than<br>30 min   | 30min - 1hr           | 1-2 hrs               | 2-4 hrs               | 4+ hours              |
|--------------------------------------------------------------------------------------------------|-----------------------|-----------------------|-----------------------|-----------------------|-----------------------|-----------------------|
| <b>Individual recreational sports</b> (e.g. swimming, gymnastics, dance, martial arts)           | <input type="radio"/> | <input type="radio"/> | <input type="radio"/> | <input type="radio"/> | <input type="radio"/> | <input type="radio"/> |
| <b>Team recreational sports</b> (e.g. hockey, soccer)                                            | <input type="radio"/> | <input type="radio"/> | <input type="radio"/> | <input type="radio"/> | <input type="radio"/> | <input type="radio"/> |
| <b>Organized music/arts classes</b>                                                              | <input type="radio"/> | <input type="radio"/> | <input type="radio"/> | <input type="radio"/> | <input type="radio"/> | <input type="radio"/> |
| <b>A school club or after hours activity at school</b>                                           | <input type="radio"/> | <input type="radio"/> | <input type="radio"/> | <input type="radio"/> | <input type="radio"/> | <input type="radio"/> |
| <b>Faith-based activities</b>                                                                    | <input type="radio"/> | <input type="radio"/> | <input type="radio"/> | <input type="radio"/> | <input type="radio"/> | <input type="radio"/> |
| <b>Community-based clubs</b> (e.g. Cubs, Brownies)                                               | <input type="radio"/> | <input type="radio"/> | <input type="radio"/> | <input type="radio"/> | <input type="radio"/> | <input type="radio"/> |
| <b>Tutoring</b>                                                                                  | <input type="radio"/> | <input type="radio"/> | <input type="radio"/> | <input type="radio"/> | <input type="radio"/> | <input type="radio"/> |
| <b>Unstructured or informal physical activities</b> (e.g., tag, pick-up soccer, playground play) | <input type="radio"/> | <input type="radio"/> | <input type="radio"/> | <input type="radio"/> | <input type="radio"/> | <input type="radio"/> |

4. In general, how satisfied are you with your child's physical activity in an average week? (considering both formal and informal activities)

- Very satisfied
- Satisfied
- Neutral
- Dissatisfied
- Very dissatisfied

**5. Pick the TOP THREE REASONS why you choose activities for your child outside of school hours.**

- He or she likes it
- To assist with child care
- To have fun
- To build a sense of self-worth
- To be creative
- Contributes to academic success
- To be physically active
- To build social relationships
- To learn a skill
- Part of my child's school curriculum
- Cost
- Provides mentorship from adults outside of your family
- Other (specify): \_\_\_\_\_

**6. Do you know about the 'Children's Fitness Tax Credit'? (\$500 from Federal Government)**

- Yes
- No
- Not sure

**If yes, did you claim the tax credit on your last income tax return?**

- Yes
- No
- Not sure

## SECTION 3: THE TECHNOLOGY GENERATION

This section asks about your child's computer and media use.

1. What is your child's favourite movie right now? \_\_\_\_\_
2. What is your child's favourite video game right now? \_\_\_\_\_
3. On average, how much time during a week day (Monday to Friday, OUTSIDE SCHOOL HOURS) and during a weekend day (Saturday or Sunday) does your child spend on the computer, watch TV/ DVDs/etc., or play video games?

|                                                    | None                  | Less than<br>30min/day | 30min to<br>1hr/day   | 1-2<br>hrs/day        | 2-3<br>hrs/day        | 3 or more<br>hrs/day  | Don't<br>Know         |
|----------------------------------------------------|-----------------------|------------------------|-----------------------|-----------------------|-----------------------|-----------------------|-----------------------|
| <b>Computer</b>                                    |                       |                        |                       |                       |                       |                       |                       |
| Week day                                           | <input type="radio"/> | <input type="radio"/>  | <input type="radio"/> | <input type="radio"/> | <input type="radio"/> | <input type="radio"/> | <input type="radio"/> |
| Weekend day                                        | <input type="radio"/> | <input type="radio"/>  | <input type="radio"/> | <input type="radio"/> | <input type="radio"/> | <input type="radio"/> | <input type="radio"/> |
| <b>TV/DVD/Videos</b>                               |                       |                        |                       |                       |                       |                       |                       |
| Week day                                           | <input type="radio"/> | <input type="radio"/>  | <input type="radio"/> | <input type="radio"/> | <input type="radio"/> | <input type="radio"/> | <input type="radio"/> |
| Weekend day                                        | <input type="radio"/> | <input type="radio"/>  | <input type="radio"/> | <input type="radio"/> | <input type="radio"/> | <input type="radio"/> | <input type="radio"/> |
| <b>Wii</b>                                         |                       |                        |                       |                       |                       |                       |                       |
| Week day                                           | <input type="radio"/> | <input type="radio"/>  | <input type="radio"/> | <input type="radio"/> | <input type="radio"/> | <input type="radio"/> | <input type="radio"/> |
| Weekend day                                        | <input type="radio"/> | <input type="radio"/>  | <input type="radio"/> | <input type="radio"/> | <input type="radio"/> | <input type="radio"/> | <input type="radio"/> |
| <b>Video games (e.g. Playstation, Nintendo DS)</b> |                       |                        |                       |                       |                       |                       |                       |
| Week day                                           | <input type="radio"/> | <input type="radio"/>  | <input type="radio"/> | <input type="radio"/> | <input type="radio"/> | <input type="radio"/> | <input type="radio"/> |
| Weekend day                                        | <input type="radio"/> | <input type="radio"/>  | <input type="radio"/> | <input type="radio"/> | <input type="radio"/> | <input type="radio"/> | <input type="radio"/> |

4. Please tell us about the most common activities that your child does on the computer.  
(mark all that apply)

- Surfs the Internet
- Non-educational games
- Educational games
- Homework
- Social networking or socializing (e.g. Facebook or My Space, MSN Chat, Skype)
- Don't know
- My child doesn't use the computer
- Other (specify): \_\_\_\_\_

5. To what extent are you involved in your child's choices concerning the above technologies?  
(e.g. computer use, video games, etc.)

- Not at all     Somewhat     Mostly     Always     My child doesn't use the above technologies

6. Does your child have the following:

- |                           |                           |                                                    |
|---------------------------|---------------------------|----------------------------------------------------|
| <b>A cell phone?</b>      | <b>An iPod?</b>           | <input type="radio"/> Any other device? (specify): |
| <input type="radio"/> Yes | <input type="radio"/> Yes | _____                                              |
| <input type="radio"/> No  | <input type="radio"/> No  | _____                                              |

## SECTION 4: FAMILY, FRIENDS, AND COMMUNITY

This section asks about relationships and how you feel within and about your community.

The next few questions are about YOUR CHILD'S relationships with friends, family and others.

**1. About how many days a week does your child do things with friends outside of school hours?**

- Never       1 day a week       2-3 days a week       4-5 days a week       6-7 days a week

**2. About how many close friends does your child have?**

- None       1       2 or 3       4 or 5       6 or more

**3. When it comes to meeting new children and making new friends, is your child:**

- Very shy       Somewhat shy       About average       Somewhat outgoing       Very outgoing

**4. During the past 6 months, how well has your child gotten along with other kids, such as friends or classmates? (excluding brothers or sisters)**

- Very well, no problems  
 Quite well, hardly any problems  
 Pretty well, occasional problems  
 Not too well, frequent problems  
 Not well at all, constant problems

**5. Since starting school in the fall, how well has your child gotten along with his/her teacher(s) at school?**

- Very well, no problems  
 Quite well, hardly any problems  
 Pretty well, occasional problems  
 Not too well, frequent problems  
 Not well at all, constant problems

**6. During the past 6 months, how well has your child gotten along with his/her parents?**

- Very well, no problems  
 Quite well, hardly any problems  
 Pretty well, occasional problems  
 Not too well, frequent problems  
 Not well at all, constant problems

**7. During the past 6 months, how well has your child gotten along with his/her brother(s)/sister(s)?**

- Very well, no problems  
 Quite well, hardly any problems  
 Pretty well, occasional problems  
 Not too well, frequent problems  
 Not well at all, constant problems  
 Not applicable (no brothers/sisters)

The following questions are about relationships and the support that YOU get from others.

|                                                                                         | Strongly agree        | Agree                 | Disagree              | Strongly disagree     |
|-----------------------------------------------------------------------------------------|-----------------------|-----------------------|-----------------------|-----------------------|
| 8. If something went wrong, no one would help me.                                       | <input type="radio"/> | <input type="radio"/> | <input type="radio"/> | <input type="radio"/> |
| 9. I have family and friends who help me feel safe, secure and happy.                   | <input type="radio"/> | <input type="radio"/> | <input type="radio"/> | <input type="radio"/> |
| 10. There is someone I trust whom I would turn to for advice if I were having problems. | <input type="radio"/> | <input type="radio"/> | <input type="radio"/> | <input type="radio"/> |
| 11. There is no one I feel comfortable talking about problems with.                     | <input type="radio"/> | <input type="radio"/> | <input type="radio"/> | <input type="radio"/> |
| 12. I lack a feeling of closeness with another person.                                  | <input type="radio"/> | <input type="radio"/> | <input type="radio"/> | <input type="radio"/> |
| 13. There are people I can count on in an emergency.                                    | <input type="radio"/> | <input type="radio"/> | <input type="radio"/> | <input type="radio"/> |
| 14. I feel part of a group of people who share my attitudes and beliefs.                | <input type="radio"/> | <input type="radio"/> | <input type="radio"/> | <input type="radio"/> |
| 15. There is no one who shares my interests and concerns.                               | <input type="radio"/> | <input type="radio"/> | <input type="radio"/> | <input type="radio"/> |

**16. When I face problems or difficulties in my family, I respond by seeking information, advice, or support from:** (mark all that apply)

- Family member(s)                       A person who has faced a similar problem  
 Co-worker(s)                                 Spiritual, religious or community leaders  
 Friend(s)                                         Books, magazines or Internet sites  
 Neighbour(s)                                  A health professional  
 Community agencies and programs designed to help families in similar situations  
 I don't seek information, advice or support from others  
 Other (specify): \_\_\_\_\_

The following questions have to do with things that your child does and ways that you, as a parent, may react to him/her.

| <b>17. How often:</b>                                                                                                                      | Never                 | About 1/wk<br>or less | A few times<br>a week | 1-2 times/day         | Many times<br>each day |
|--------------------------------------------------------------------------------------------------------------------------------------------|-----------------------|-----------------------|-----------------------|-----------------------|------------------------|
| ...do you praise your child, by saying something like "Good for you!" or "What a nice thing you did! Thank you!", or "That's good going!"? | <input type="radio"/> | <input type="radio"/> | <input type="radio"/> | <input type="radio"/> | <input type="radio"/>  |
| ...do you and your child talk or play with each other, focusing attention on each other for five minutes or more, just for fun?            | <input type="radio"/> | <input type="radio"/> | <input type="radio"/> | <input type="radio"/> | <input type="radio"/>  |
| ...do you and your child laugh together?                                                                                                   | <input type="radio"/> | <input type="radio"/> | <input type="radio"/> | <input type="radio"/> | <input type="radio"/>  |
| ...do you do something special with your child that he/she enjoys?                                                                         | <input type="radio"/> | <input type="radio"/> | <input type="radio"/> | <input type="radio"/> | <input type="radio"/>  |
| ...do you play sports, hobbies or games with your child?                                                                                   | <input type="radio"/> | <input type="radio"/> | <input type="radio"/> | <input type="radio"/> | <input type="radio"/>  |

The next questions are about certain aspects of your neighbourhood.

**18. How do you feel about your neighbourhood as a place to raise your children? Is it:**

- Excellent?  Good?  Average?  Poor?  Very poor?

**19. Are you involved in any local voluntary organizations such as school groups, church groups, community or ethnic organizations?**

- Yes  
 No

Please tell us whether you strongly agree, agree, disagree or strongly disagree with the following statements about your neighbourhood.

|                                                                                                                 | Strongly agree        | Agree                 | Disagree              | Strongly disagree     |
|-----------------------------------------------------------------------------------------------------------------|-----------------------|-----------------------|-----------------------|-----------------------|
| 20. It is safe to walk alone in this neighbourhood after dark.                                                  | <input type="radio"/> | <input type="radio"/> | <input type="radio"/> | <input type="radio"/> |
| 21. It is safe for children to play outside during the day.                                                     | <input type="radio"/> | <input type="radio"/> | <input type="radio"/> | <input type="radio"/> |
| 22. There are safe parks, playgrounds and play spaces in this neighbourhood.                                    | <input type="radio"/> | <input type="radio"/> | <input type="radio"/> | <input type="radio"/> |
| 23. If there is a problem around here, the neighbours get together to deal with it.                             | <input type="radio"/> | <input type="radio"/> | <input type="radio"/> | <input type="radio"/> |
| 24. There are adults in the neighbourhood that children can look up to.                                         | <input type="radio"/> | <input type="radio"/> | <input type="radio"/> | <input type="radio"/> |
| 25. People around here are willing to help their neighbours.                                                    | <input type="radio"/> | <input type="radio"/> | <input type="radio"/> | <input type="radio"/> |
| 26. You can count on adults in this neighbourhood to watch out that children are safe and don't get in trouble. | <input type="radio"/> | <input type="radio"/> | <input type="radio"/> | <input type="radio"/> |
| 27. When I'm away from home, I know that my neighbours will keep their eyes open for possible trouble.          | <input type="radio"/> | <input type="radio"/> | <input type="radio"/> | <input type="radio"/> |

For the next questions, please think back over the last year.

**28. In the last year, how often did you:**

|                                                                                                   |                                  |                                    |                                  |
|---------------------------------------------------------------------------------------------------|----------------------------------|------------------------------------|----------------------------------|
| Attend or take part in a recreational event in your community? (e.g. a sporting event or concert) | <input type="radio"/> Not at all | <input type="radio"/> Occasionally | <input type="radio"/> Frequently |
| Work with a children's group, club or team?                                                       | <input type="radio"/> Not at all | <input type="radio"/> Occasionally | <input type="radio"/> Frequently |
| Help with a neighbourhood or community social event?                                              | <input type="radio"/> Not at all | <input type="radio"/> Occasionally | <input type="radio"/> Frequently |
| Help out a neighbour? (e.g. child care, yard work)                                                | <input type="radio"/> Not at all | <input type="radio"/> Occasionally | <input type="radio"/> Frequently |
| Go to a meeting dealing with community concerns? (e.g. Block Parents)                             | <input type="radio"/> Not at all | <input type="radio"/> Occasionally | <input type="radio"/> Frequently |
| Go to neighbourhood events? (e.g. picnics)                                                        | <input type="radio"/> Not at all | <input type="radio"/> Occasionally | <input type="radio"/> Frequently |

## SECTION 5: YOUR CHILD'S HEALTH

**This section asks about your child's physical health, emotions and behaviours. We would like to know about your child's health, from HEAD to TOE!**

**1. In general, compared to other children the same age, would you say that your child's health is:**

- Excellent     
  Very good     
  Good     
  Fair     
  Poor

**2. Over the past few months, how often has your child been in good health?**

- Almost all of the time  
 Often  
 About half of the time  
 Sometimes  
 Almost never

**3. How much does your child currently weigh without shoes on?**

(give your best estimate in pds or kgs)

lbs.    OR       kg.

**4. How tall is your child without shoes on?**

(give your best estimate in feet or cm)

ft.      in.      OR         cm.

*The following question refers to conditions that have lasted or are expected to last 6 months or more and have been diagnosed by a health professional.*

**5. Has a health professional ever told you that your child has:** (check all that apply)

- |                                                                                      |                                                                         |
|--------------------------------------------------------------------------------------|-------------------------------------------------------------------------|
| <input type="radio"/> Asthma                                                         | <input type="radio"/> Epilepsy                                          |
| <input type="radio"/> Food allergies                                                 | <input type="radio"/> Lung problems                                     |
| <input type="radio"/> Other allergies (hay fever or allergic rhinitis)               | <input type="radio"/> A hearing problem                                 |
| <input type="radio"/> Chronic (repeated) chest infections<br>(bronchitis, pneumonia) | <input type="radio"/> A vision problem                                  |
| <input type="radio"/> Chronic (repeated) ear infections<br>(otitis media)            | <input type="radio"/> Arthritis/joint problems                          |
| <input type="radio"/> Cerebral palsy                                                 | <input type="radio"/> Kidney problems                                   |
| <input type="radio"/> Limited movement ability                                       | <input type="radio"/> Heart problems                                    |
| <input type="radio"/> Learning problems                                              | <input type="radio"/> Emotional, psychological, or behavioural problems |
| <input type="radio"/> Any other long-term conditions                                 |                                                                         |

IF YES, please specify:

---

**6. Has your child gone to see a doctor (GP) for a routine health exam in the last 12 months?**

- Yes     No



**7. Has a health professional recently raised concerns about either of the following?**

- Your child being underweight    Your child being overweight    No concerns

**8. In your opinion, do you feel your child:**

- Should weigh more?    Is about the right weight?    Should weigh less?

**9. In the past year, have you seen or talked on the phone with any of the following specialists? (mark all that apply)**

- Speech and language pathologist  
 Pediatrician  
 Specialist pediatrician (e.g. respirologist, endocrinologist, neurologist)  
 Developmental pediatrician  
 Psychologist  
 Occupational therapist  
 Physiotherapist  
 Dietician  
 I have not had contact with a specialist  
 Other (specify): \_\_\_\_\_

**10. Was there ever a time during the past 12 months when you wanted to see a professional for your child but didn't?**

- Yes    No   If no, skip to question 11.

**If yes, what type of professional did you want to see? (check all that apply)**

- Family doctor or medical specialist    Eye doctor    Public health nurse or other nurse  
 Dentist    Pharmacist    Naturopath  
 Psychologist or other counsellor    Social worker    Child Services  
 Physiotherapist    Chiropractor  
 Other (specify): \_\_\_\_\_

**If yes, what was the MAIN reason for not going? (check only one)**

- Too expensive  
 Didn't know who to see, where to go or who to call  
 Too far away or transportation problem  
 Couldn't get an appointment/takes too long  
 No hospital bed  
 Language problem  
 Too embarrassed to go  
 No one seemed to care  
 Past contacts were not helpful  
 Too busy  
 Help probably would not do any good  
 Other (specify): \_\_\_\_\_

**11. Compared to other parents, have you ever felt that you were receiving inferior services for your child?** (any service, not just the ones mentioned)

- Yes  No

**12. Has your child gone to see a dentist for a routine dental health exam in the last 12 months?**

- Yes  No

**13. How many times per year do you schedule routine dental appointments for your child?**

- Once  Twice  3 - 5 times  6+ times  I don't schedule routine visits for my child

**14. How old was your child when he or she first saw a dentist?**  years old

**15. Has your child ever had a cavity?**

- Yes  No  Don't know

**If yes, how old was your child when he or she had their first cavity?**  years old

**16. How many days a week are your child's teeth brushed?**

- 0  1  2  3  4  5  6  7

**17. How many days a week are your child's teeth flossed?**

- 0  1  2  3  4  5  6  7

**18. In general, how long does it take your child to fall asleep?**

- 15 minutes or less  
 16 minutes to 30 minutes  
 31 minutes to 45 minutes  
 46 minutes to 60 minutes  
 More than 60 minutes  
 More than 2 hours  
 More than 3 hours

**19. How many total hours of sleep does your child get at night?**  hours

*Now some questions about certain experiences or difficulties that your child may experience at night.*

**20. Does your child have nightmares?**

- Yes  
 No  If no, skip to question 21.

**If yes, how many times in a typical week does this happen?**  times

**21. Does your child snore during the night?**

- Yes  
 No  
 Don't know

**22. Does your child wet his or her bed at night?**

- Yes  If no, skip to question 23.  
 No

**If yes, how many times in a typical week does this happen?**  times

**23. Here is a list of statements about the feelings and behaviours of children. The response choices range from "Never or not true" to "Often or very true." Please tell us which response choice best describes your child within the past 6 months.**

|                                                       | Never or<br>not true  | Sometimes or<br>somewhat true | Often or very<br>true |
|-------------------------------------------------------|-----------------------|-------------------------------|-----------------------|
| Argues a lot with adults.                             | <input type="radio"/> | <input type="radio"/>         | <input type="radio"/> |
| Blames others for own mistakes.                       | <input type="radio"/> | <input type="radio"/>         | <input type="radio"/> |
| Easily annoyed by others.                             | <input type="radio"/> | <input type="radio"/>         | <input type="radio"/> |
| Angry and resentful.                                  | <input type="radio"/> | <input type="radio"/>         | <input type="radio"/> |
| Temper tantrums or hot temper.                        | <input type="radio"/> | <input type="radio"/>         | <input type="radio"/> |
| Does things that annoy others.                        | <input type="radio"/> | <input type="radio"/>         | <input type="radio"/> |
| Gets back at people.                                  | <input type="radio"/> | <input type="radio"/>         | <input type="radio"/> |
| Swearing or obscene language.                         | <input type="radio"/> | <input type="radio"/>         | <input type="radio"/> |
| Defiant, talks back to adults.                        | <input type="radio"/> | <input type="radio"/>         | <input type="radio"/> |
| Can't concentrate, can't pay attention for long.      | <input type="radio"/> | <input type="radio"/>         | <input type="radio"/> |
| Jumps from one activity to another.                   | <input type="radio"/> | <input type="radio"/>         | <input type="radio"/> |
| Interrupts or butts in on others.                     | <input type="radio"/> | <input type="radio"/>         | <input type="radio"/> |
| Does dangerous things without thinking.               | <input type="radio"/> | <input type="radio"/>         | <input type="radio"/> |
| Doesn't seem to listen.                               | <input type="radio"/> | <input type="radio"/>         | <input type="radio"/> |
| Fidgets.                                              | <input type="radio"/> | <input type="radio"/>         | <input type="radio"/> |
| Can't stay seated when required to do so.             | <input type="radio"/> | <input type="radio"/>         | <input type="radio"/> |
| Has difficulty playing quietly.                       | <input type="radio"/> | <input type="radio"/>         | <input type="radio"/> |
| Impulsive, acts without thinking.                     | <input type="radio"/> | <input type="radio"/>         | <input type="radio"/> |
| Has difficulty awaiting turn in games or groups.      | <input type="radio"/> | <input type="radio"/>         | <input type="radio"/> |
| Talks excessively.                                    | <input type="radio"/> | <input type="radio"/>         | <input type="radio"/> |
| Distractible, has trouble sticking to any activity.   | <input type="radio"/> | <input type="radio"/>         | <input type="radio"/> |
| Interrupts, blurts out answers to questions too soon. | <input type="radio"/> | <input type="radio"/>         | <input type="radio"/> |
| Loses things.                                         | <input type="radio"/> | <input type="radio"/>         | <input type="radio"/> |
| Has difficulty following directions or instructions.  | <input type="radio"/> | <input type="radio"/>         | <input type="radio"/> |
| Needs to be told over and over that things are ok.    | <input type="radio"/> | <input type="radio"/>         | <input type="radio"/> |
| Worries about doing better at things.                 | <input type="radio"/> | <input type="radio"/>         | <input type="radio"/> |
| Self-conscious or easily embarrassed.                 | <input type="radio"/> | <input type="radio"/>         | <input type="radio"/> |
| Nervous, highstrung or tense.                         | <input type="radio"/> | <input type="radio"/>         | <input type="radio"/> |

Please tell us which response choice best describes your child within the past 6 months.

|                                                             | Never or<br>not true  | Sometimes or<br>somewhat true | Often or very<br>true |
|-------------------------------------------------------------|-----------------------|-------------------------------|-----------------------|
| Worries about past behaviour.                               | <input type="radio"/> | <input type="radio"/>         | <input type="radio"/> |
| Worries about things in the future.                         | <input type="radio"/> | <input type="radio"/>         | <input type="radio"/> |
| Unhappy, sad or depressed.                                  | <input type="radio"/> | <input type="radio"/>         | <input type="radio"/> |
| Has gained a lot of weight without trying to.               | <input type="radio"/> | <input type="radio"/>         | <input type="radio"/> |
| Gets no pleasure from usual activities.                     | <input type="radio"/> | <input type="radio"/>         | <input type="radio"/> |
| Feels too guilty.                                           | <input type="radio"/> | <input type="radio"/>         | <input type="radio"/> |
| Cranky.                                                     | <input type="radio"/> | <input type="radio"/>         | <input type="radio"/> |
| Has no interest in usual activities.                        | <input type="radio"/> | <input type="radio"/>         | <input type="radio"/> |
| Has lost a lot of weight without trying to.                 | <input type="radio"/> | <input type="radio"/>         | <input type="radio"/> |
| Can't sit still, restless or hyperactive.                   | <input type="radio"/> | <input type="radio"/>         | <input type="radio"/> |
| Underactive, slow moving, or lacks energy.                  | <input type="radio"/> | <input type="radio"/>         | <input type="radio"/> |
| Sleeps more than most children during the day and/or night. | <input type="radio"/> | <input type="radio"/>         | <input type="radio"/> |
| Overtired.                                                  | <input type="radio"/> | <input type="radio"/>         | <input type="radio"/> |
| Trouble sleeping.                                           | <input type="radio"/> | <input type="radio"/>         | <input type="radio"/> |
| Feels worthless or inferior.                                | <input type="radio"/> | <input type="radio"/>         | <input type="radio"/> |
| Has difficulty making decisions.                            | <input type="radio"/> | <input type="radio"/>         | <input type="radio"/> |

24. Using the same rating scale as above, how often would you say that your child...

|                                                                                                  | Never or<br>not true  | Sometimes or<br>somewhat | Often or very<br>true |
|--------------------------------------------------------------------------------------------------|-----------------------|--------------------------|-----------------------|
| Shows sympathy to someone who has made a mistake?                                                | <input type="radio"/> | <input type="radio"/>    | <input type="radio"/> |
| Will try to help someone who has been hurt?                                                      | <input type="radio"/> | <input type="radio"/>    | <input type="radio"/> |
| Volunteers to help clear up a mess that someone else has made?                                   | <input type="radio"/> | <input type="radio"/>    | <input type="radio"/> |
| If there is a quarrel or dispute, will try to stop it?                                           | <input type="radio"/> | <input type="radio"/>    | <input type="radio"/> |
| Offers to help other children (friend, brother or sister) who are having difficulty with a task? | <input type="radio"/> | <input type="radio"/>    | <input type="radio"/> |
| Comforts a child (friend, brother or sister) who is crying or upset?                             | <input type="radio"/> | <input type="radio"/>    | <input type="radio"/> |
| Spontaneously helps to pick up objects that somebody has dropped?                                | <input type="radio"/> | <input type="radio"/>    | <input type="radio"/> |
| Will invite others to join in a game?                                                            | <input type="radio"/> | <input type="radio"/>    | <input type="radio"/> |
| Helps other children (friends, brother or sister) who are feeling sick?                          | <input type="radio"/> | <input type="radio"/>    | <input type="radio"/> |
| Helps those who do not do as well as he/she does?                                                | <input type="radio"/> | <input type="radio"/>    | <input type="radio"/> |

**25. Please rate your child's overall self-esteem using the following scale, where 0=very poor and 10 = very good. Give your rating by drawing a line through, or putting a notch on, the horizontal line.**

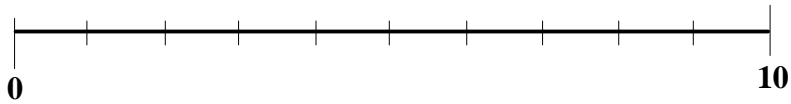

*Some children may experience events in their lives that cause them a great amount of worry or unhappiness.*

**26. Please indicate if (and when) any of the following events caused worry or unhappiness for your child. (check all that apply)**

|                                                        | Younger than<br>5 years | 5 years or<br>older   |
|--------------------------------------------------------|-------------------------|-----------------------|
| Death of parent(s)                                     | <input type="radio"/>   | <input type="radio"/> |
| Death in family (other than parents)                   | <input type="radio"/>   | <input type="radio"/> |
| Divorce or separation of parents                       | <input type="radio"/>   | <input type="radio"/> |
| Residential move (including within the city)           | <input type="radio"/>   | <input type="radio"/> |
| Stay in hospital                                       | <input type="radio"/>   | <input type="radio"/> |
| Stay in foster home                                    | <input type="radio"/>   | <input type="radio"/> |
| Other separation from parents for more than a few days | <input type="radio"/>   | <input type="radio"/> |
| Someone moved into home                                | <input type="radio"/>   | <input type="radio"/> |
| Someone moved out of home                              | <input type="radio"/>   | <input type="radio"/> |
| Birth of sibling                                       | <input type="radio"/>   | <input type="radio"/> |
| Significant illness / injury of child                  | <input type="radio"/>   | <input type="radio"/> |
| Significant illness / injury of a family member        | <input type="radio"/>   | <input type="radio"/> |
| Abuse / fear of abuse                                  | <input type="radio"/>   | <input type="radio"/> |
| Alcoholism or mental health disorder in family         | <input type="radio"/>   | <input type="radio"/> |

## SECTION 6: YOUR CHILD'S SCHOOL LIFE

This section asks about your child's school life in terms of what he or she is doing, how he or she is doing and what you think about his or her school.

1. What part of going to school does your child enjoy the most?

---

2. What grade is your child in?

3. In which type of schooling is your child currently enrolled? (check only one)

- Public or separate school
- Charter school
- Private school
- Home schooling

4. Is your child enrolled in any of the following special academic programs?

- School program for special needs students
- Language immersion program
- Specialized curriculum (e.g. arts, science, athletics)
- Not applicable
- Other (Please specify): \_\_\_\_\_

5. Did you delay your child's entry into school? (e.g. your child was eligible for school but you decided to hold him/her back)

- Yes
- No      If no, skip to question 6.

**If yes, why?**

---

6. Has your child ever repeated a grade? (including kindergarten)

- Yes
- No

7. Has your child ever skipped a grade? (including kindergarten)

- Yes
- No

8. Has your child changed schools or type of schooling since starting school?

- Yes
- No      If no, skip to question 9.

**If yes, how many times?**  times

9. Based on your knowledge of your child's school work to date (including report cards, if applicable), how is your child doing at school this year?

- Very well       Well       Average       Poorly       Very poorly

**If your child is currently home schooled, please skip to section 7 - Your Health.**

**10. Does your child have an Individual Program Plan (IPP)?**

- Yes
- No            If no, skip to question 11.

**If yes, what are the reasons for the IPP? (mark all that apply)**

- Reading disorder or dyslexia             Attention Deficit and Hyperactivity Disorder (ADHD)
- Fetal Alcohol Spectrum Disorder         Behavioural problems
- Problem with speech or language         Other physical impairment/disability
- Problem with sight                             Medical or health problem
- Problem with hearing                         Mental illness/depression
- Gifted/High IQ                                 English as an additional language
- Learning difficulties
- Autism, Asperger's syndrome, Autistic spectrum disorder or Pervasive Developmental Disorder
- Other reason (specify): \_\_\_\_\_

**11. Which of the following factors were most important to choosing your child's school? (mark all that apply)**

- School is conveniently located
- Child's friends attend same school
- Siblings attend same school
- School had good reputation
- School has small class sizes
- School caters to special needs
- School offers specialized curriculum (e.g. arts, science, athletics, etc.)
- Religious content and environment
- School offers before or after school care
- Attending this school makes it easier to get into a particular secondary school (feeder school)

**12. During the previous school year, about how many days was your child absent from school for any reason?**

- None
- 1 - 3 days
- 4 - 6 days
- 7 - 10 days
- 11 - 20 days
- More than 20 days
- Not in school last year

**13. What was the MAIN reason for your child being absent from school?**

(select only one)

- Health reasons (illness or injuries)
- Problems with transportation
- Problems with the weather
- A family vacation
- A fear of school
- A problem with the teacher
- A problem with children at school
- Difficulties with childcare arrangements
- Other (specify): \_\_\_\_\_

*A few questions about what goes on at school.***14. How often does your child talk to you about what happens at school?**

- Every day    3 - 4 times a week    1 - 2 times a week    1 - 2 times a month    Less than once a month    Never

**15. Does your child tell you that they enjoy school?**

- Every day    3 - 4 times a week    1 - 2 times a week    1 - 2 times a month    Less than once a month    Never

**16. How often is your child upset or reluctant to go to school?**

- Every day    3 - 4 times a week    1 - 2 times a week    1 - 2 times a month    Less than once a month    Never

**17. To the best of your knowledge, how often has your child been bullied at school?**

- Every day    3 - 4 times a week    1 - 2 times a week    1 - 2 times a month    Less than once a month    Never

**18. To the best of your knowledge, how often has your child bullied other children at school?**

- Every day    3 - 4 times a week    1 - 2 times a week    1 - 2 times a month    Less than once a month    Never

**19. Do you or someone in your family do any of the following at your child's school?**

(mark all that apply)

- Help out in the classroom
- Help out in the library
- Help out on school trips
- Help out at lunch time or recess
- Help with fund-raising activities
- Help with special events (e.g. sport days) or special interest groups like drama/sports
- Participate in a parents' association/committee/group
- Other (specify): \_\_\_\_\_



## SECTION 7: YOUR HEALTH

**You are important. We would like to know how you are feeling overall, and about certain experiences that you may have had.**

*This section asks for your views about your health.*

**1. In general, how would you rate your physical health in the past 6 months?**

- Excellent
- Very good
- Good
- Fair
- Poor

**2. In general, how would you rate your emotional health in the past 6 months?**

- Excellent
- Very good
- Good
- Fair
- Poor

*The next questions are about your outlook towards time use.*

**3. In the past 12 months, how often did you worry that you were not spending enough time with your spouse/partner?**

- All of the time
- Most of the time
- Sometimes
- Never
- Not currently in a relationship

**4. In the past 12 months, how often did you worry that you were not spending enough time with your child(ren)?**

- All of the time
- Most of the time
- Sometimes
- Never

**5. In the past 12 months, how often did you feel that the time spent with your child(ren) was good quality time?**

- All of the time
- Most of the time
- Sometimes
- Never

**6. In the past 12 months, how often did you worry that you were not spending enough time with your friends?**

- All of the time
- Most of the time
- Sometimes
- Never

**7. Raising children and finding the time and/or energy for things we need or want to do can be a challenge. How much tension would you say you feel from juggling all your activities of daily living?**

0     1     2     3     4     5     6     7     8     9     10

No tension

A great deal  
of tension

**8. Please indicate if any of the following has happened to you (or your spouse/partner, if applicable), during the past 12 months.**

|                                                        | Yes                   | No                    |
|--------------------------------------------------------|-----------------------|-----------------------|
| Stopped full-time schooling.                           | <input type="radio"/> | <input type="radio"/> |
| Lost job or was unemployed.                            | <input type="radio"/> | <input type="radio"/> |
| Quit or retired from full-time work.                   | <input type="radio"/> | <input type="radio"/> |
| Started working or changed jobs.                       | <input type="radio"/> | <input type="radio"/> |
| Had financial problems.                                | <input type="radio"/> | <input type="radio"/> |
| Got married.                                           | <input type="radio"/> | <input type="radio"/> |
| My spouse/partner and I separated.                     | <input type="radio"/> | <input type="radio"/> |
| Someone moved out of our home.                         | <input type="radio"/> | <input type="radio"/> |
| Someone moved into our home.                           | <input type="radio"/> | <input type="radio"/> |
| Arrival of a baby into our home.                       | <input type="radio"/> | <input type="radio"/> |
| Serious illness.                                       | <input type="radio"/> | <input type="radio"/> |
| Serious illness of someone dear.                       | <input type="radio"/> | <input type="radio"/> |
| Death of someone dear.                                 | <input type="radio"/> | <input type="radio"/> |
| Charged with any offence other than a traffic offense. | <input type="radio"/> | <input type="radio"/> |

*Now a few questions about things that may have happened when you were a child.*

**9. Before the age of 16...**

|                                                                | Yes                   | No                    |
|----------------------------------------------------------------|-----------------------|-----------------------|
| Did your parents separate or divorce?                          | <input type="radio"/> | <input type="radio"/> |
| Did you ever stay overnight at a detention or juvenile centre? | <input type="radio"/> | <input type="radio"/> |
| Did you ever stay overnight at a police station or jail?       | <input type="radio"/> | <input type="radio"/> |
| Were you ever in foster care or a group home?                  | <input type="radio"/> | <input type="radio"/> |

## SECTION 8: BEFORE YOU GO

**Finally, we would like to ask you some background questions about yourself. We use this information to compare groups of people, and not specific individuals.**

**1. Including yourself, how many people are living in your home?**

Number of adults (18 and over):

Number of children (under 18):

**2. What is your current marital status?**

- Single (never married)
- Married
- Common-Law (living with partner)
- Divorced
- Separated
- Widowed

**3. What was your marital status at the birth of your child?**

- Single (never married)
- Married
- Common-Law (living with partner)
- Divorced
- Separated
- Widowed

**4. How many changes in marital status have you experienced between the birth of your child and the present time?  change(s)**

*A 'change' can be ANY change, regardless of the type of change. For example, moving in with someone as common-law is a 'change,' as is a separation or divorce.*

**5. What is the highest level of schooling you have completed?**

- No formal schooling
- Less than high school
- Graduated high school
- Some community college, technical college or trade/vocational program
- Some university
- Diploma or certificate from community college, technical college or trade/vocational program
- Bachelor's or undergraduate degree
- Master's degree
- Degree in medicine or law
- Earned doctorate

**6. Which of the following best describes your MAIN activity? (check only one)**

- Employed or self-employed
- A homemaker
- Looking for employment
- On paid maternity leave
- A student
- Other (specify): \_\_\_\_\_

**7. If employed or self-employed, about how many hours per week do you usually work?**

- Less than 10 hours
- Between 10 and 19 hours
- Between 20 and 29 hours
- Between 30 and 39 hours
- Between 40 and 49 hours
- 50 hours or more
- Not applicable (not currently employed)

**8. Which of the following was true for your household in the past 3 months?**

|                                                                               | True                  | Not true              |
|-------------------------------------------------------------------------------|-----------------------|-----------------------|
| Sometimes we didn't have enough money for our food and daily living expenses. | <input type="radio"/> | <input type="radio"/> |
| We've gone to a food bank.                                                    | <input type="radio"/> | <input type="radio"/> |
| We have not been able to pay all of our bills.                                | <input type="radio"/> | <input type="radio"/> |

**9. Do you worry about whether the money you have will be enough to support your family?**

- Strongly agree       Agree       Disagree       Strongly disagree

**10. How well would you say your household is managing financially these days?**

- We're living comfortably
- We're doing alright
- We're just about getting by
- We're finding it quite difficult
- We're finding it very difficult

**11. What is your total income before taxes and deductions of all household members from all sources in the past 12 months?**

- Less than \$20,000       \$100,000 - \$119,999
- \$20,000 - \$39,999       \$120,000 - \$139,999
- \$40,000 - \$59,999       \$140,000 - \$159,999
- \$60,000 - \$79,999       \$160,000 or above
- \$80,000 - \$99,999       I prefer not to answer this question

**12. What type of housing are you currently living in?**

- House
- Apartment
- Duplex/Four-plex
- Group dwelling (e.g. hotel, shelter, boarding house, colony)
- Townhouse
- Condominium
- Other (specify): \_\_\_\_\_

**13. Do you rent or own the housing you are currently living in?**

- Rent
- Own
- Living with family (no rent)
- Other (specify): \_\_\_\_\_

**14. How satisfied people are with the places they live depends on a lot of things - how much space they have, how hot or cold it gets, how quiet it is, how much privacy there is, and so on. Taking everything into account, please rate how satisfied you are with your home.**

- 0     1     2     3     4     5     6     7     8     9     10
- Completely dissatisfied Completely satisfied

**15. May we contact you if we have questions about this survey?**

- No
- Yes
- IF YES, please provide your phone number (optional): \_\_\_\_\_
- and/or email address (optional): \_\_\_\_\_

**16. May we contact you to participate in future follow-ups of the Community Perinatal Care Study?**

- No
- Yes
- IF YES, please provide your phone number (optional): \_\_\_\_\_
- and/or email address (optional): \_\_\_\_\_

*If you have any medical questions concerning your child, we encourage you to talk to your family doctor or call the Calgary Health Link at 403-943-LINK (5465). For urgent medical concerns please go the nearest Emergency Department. For mental health concerns please call the Distress Centre at 403-266-1606, the Calgary Counseling Centre at 403-265-4980, or your local Emergency Department.*
